# Supplementary material for: Palladium-catalysed direct arylation of a tris-cyclometallated Ir(iii) complex bearing 2,2′-thienylpyridine ligands: a powerful tool for the tuning of luminescence properties
Source: Royal Society of Chemistry journal article supplement (doi:10.1039/c2cc16327f), 2011-11-22
Supplement: c2cc16327f.pdf [file c2cc16327f.pdf]

## Supplementary material

### **Palladium-Catalysed Direct Arylation of a Tris-Cyclometallated Ir(III) Complex Bearing 2,2'-Thienylpyridine Ligands: A Powerful Tool for the Tuning of Luminescence Properties**

*Kassem Beydoun,<sup>a</sup> Moussa Zaarour,<sup>a</sup> J.A. Gareth Williams,<sup>b</sup> Henri Doucet,\*<sup>a</sup> Véronique Guerchais\*<sup>a</sup>*

*<sup>a</sup> Institut Sciences Chimiques de Rennes, UMR 6226 CNRS-Université de Rennes 1 "Organométalliques, Matériaux et Catalyse", 35042 Rennes Cedex, France. Tel: 33 (0)2 23 23 63 84; E-mail: henri.doucet@univ-rennes1.fr, veronique.guerchais@univ-rennes1.fr.*

*<sup>b</sup> Department of Chemistry, Durham University, South Road, Durham, UK DH1 3LE.*

#### **General procedure**

As a typical experiment, the reaction of the aryl bromide (2 or 3 mmol), iridium complex **1** (0.336 g, 0.5 mmol) and KOAc (0.294 g, 3 mmol) at 130-150 °C during 24-48 h in DMAc (5 mL) in the presence of Pd(OAc)<sub>2</sub> (0.005 g, 0.025 mmol), under argon affords the coupling product after evaporation of the solvent and filtration on silica gel (pentane/ether) or (pentane/dichloromethane/methanol).

#### **Monoarylation of **1** with 4-bromobenzonitrile (**2a**)**

The reaction of 4-bromobenzonitrile (0.364 g, 2 mmol), **1** (0.336 g, 0.5 mmol) and KOAc (0.294 g, 3 mmol) with Pd(OAc)<sub>2</sub> (0.005 g, 0.025 mmol) in DMAc (5 mL) at 130 °C during 3 h affords the product **2a** in 12% (0.046 g) isolated yield as a brown solid.

<sup>1</sup>H NMR (500 MHz, CDCl<sub>3</sub>): δ 7.65-7.45 (m, 13H), 7.27 (d, *J* = 4.6 Hz, 1H), 7.25 (d, *J* = 4.6 Hz, 1H), 6.84-6.74 (m, 4H), 6.54 (d, *J* = 4.6 Hz, 1H), 6.46 (d, *J* = 4.6 Hz, 1H). <sup>13</sup>C NMR (125 MHz, CD<sub>2</sub>Cl<sub>2</sub>): δ 162.5, 162.4, 161.7, 161.0, 158.7, 158.6, 148.2, 147.9, 144.6, 139.1, 137.7, 136.9, 136.8, 135.4, 135.2,

135.1, 135.0, 134.9, 133.8, 132.4, 128.2, 128.0, 120.1, 119.4, 119.3, 118.9, 117.9, 117.6, 117.5, 109.9.

HRMS calcd for  $M^+$   $C_{34}H_{21}F_9IrN_4S_3$  774.0552, found 774.0551.

#### Diarylation of **1** with 4-bromobenzonitrile (**2b**)

The reaction of 4-bromobenzonitrile (0.364 g, 2 mmol), **1** (0.336 g, 0.5 mmol) and KOAc (0.294 g, 3 mmol) with  $Pd(OAc)_2$  (0.005 g, 0.025 mmol) in DMAc (5 mL) at 130 °C during 3 h affords the product **2b** in 38% (0.057 g) isolated yield as a brown solid.

$^1H$  NMR (500 MHz,  $CDCl_3$ ):  $\delta$  7.66-7.47 (m, 17H), 7.29 (d,  $J = 4.6$  Hz, 1H), 6.88 (s, 1H), 6.84-6.79 (m, 3H), 6.78 (s, 1H), 6.56 (d,  $J = 4.6$  Hz, 1H).  $^{13}C$  NMR (125 MHz,  $CD_2Cl_2$ ):  $\delta$  162.4, 161.7, 161.6, 160.4, 160.3, 158.1, 148.2, 147.9, 144.8, 139.0, 138.9, 137.9, 137.8, 137.2, 137.1, 135.3, 133.8, 133.6, 132.5, 128.3, 126.0, 120.2, 119.5, 119.0, 118.9, 118.1, 118.0, 117.7, 109.9. HRMS calcd for  $M^+$   $C_{41}H_{24}F_9IrN_5S_3$  875.0818, found 875.0814.

#### Triarylation of **1** with 4-bromobenzonitrile (**2c**)

The reaction of 4-bromobenzonitrile (0.546 g, 3 mmol), **1** (0.336 g, 0.5 mmol) and KOAc (0.294 g, 3 mmol) with  $Pd(OAc)_2$  (0.005 g, 0.025 mmol) in DMAc (5 mL) at 150 °C during 48 h affords the product **2c** in 64% (0.280 g) isolated yield as a brown solid.

$^1H$  NMR (500 MHz, DMSO):  $\delta$  7.80 (t,  $J = 7.8$  Hz, 3H), 7.76 (d,  $J = 8.2$  Hz, 6H), 7.71 (d,  $J = 7.8$  Hz, 3H), 7.65 (d,  $J = 8.2$  Hz, 6H), 7.55 (d,  $J = 6.2$  Hz, 3H), 7.10 (t,  $J = 6.5$  Hz, 3H), 6.84 (s, 3H).  $^{13}C$  NMR (125 MHz, DMSO):  $\delta$  161.3, 160.0, 148.9, 144.9, 139.1, 139.0, 138.5, 134.0, 133.9, 126.8, 122.3, 119.8, 119.1, 110.1. HRMS calcd for  $M^+$   $C_{48}H_{27}F_9IrN_6S_3$  976.1083, found 976.1082.

#### Diarylation of **1** with 4-nitrobromobenzene (**3b**)

The reaction of 4-bromonitrobenzene (0.606 g, 3 mmol), **1** (0.336 g, 0.5 mmol) and KOAc (0.294 g, 3 mmol) with  $Pd(OAc)_2$  (0.005 g, 0.025 mmol) in DMAc (5 mL) at 130 °C during 24 h affords the

product **3b** in 50% (0.225 g) isolated yield as a brown solid.

$^1\text{H}$  NMR (500 MHz,  $\text{CD}_2\text{Cl}_2$ ):  $\delta$  8.18 (d,  $J = 8.7$  Hz, 2H), 8.14 (d,  $J = 8.7$  Hz, 2H), 7.76-7.55 (m, 13H), 7.33 (d,  $J = 4.5$  Hz, 1H), 6.99 (s, 1H), 6.92 (t,  $J = 6.7$  Hz, 2H), 6.88 (s, 1H), 6.87 (t,  $J = 6.4$  Hz, 1H), 6.56 (d,  $J = 4.5$  Hz, 1H).  $^{13}\text{C}$  NMR (125 MHz,  $\text{CD}_2\text{Cl}_2$ ):  $\delta$  162.2, 161.4, 161.3, 160.2, 160.0, 157.7, 148.0, 147.8, 146.0, 144.1, 144.0, 140.9, 140.8, 138.7, 138.6, 137.0, 136.9, 135.2, 135.0, 134.5, 134.3, 134.2, 130.7, 128.6, 128.5, 128.4, 125.7, 124.0, 123.9, 120.3, 119.4, 118.1, 118.0, 117.6, 104.9. HRMS calcd for  $\text{M}^+$   $\text{C}_{39}\text{H}_{24}\text{IrN}_5\text{S}_3$  915.0614, found 915.0613.

#### Triarylation of **1** with 4-trifluoromethylbromobenzene (**4c**)

The reaction of 4-bromotrifluoromethylbromobenzene (0.675 g, 3 mmol), **1** (0.336 g, 0.5 mmol) and KOAc (0.294 g, 3 mmol) with  $\text{Pd}(\text{OAc})_2$  (0.005 g, 0.025 mmol) in DMAc (5 mL) at 130 °C during 48 h affords the product **4c** in 48% (0.258 g) isolated yield as a brown solid.

$^1\text{H}$  NMR (500 MHz,  $\text{CDCl}_3$ ):  $\delta$  7.68 (d,  $J = 7.9$  Hz, 6H), 7.62-7.75 (m, 15H), 6.90 (s, 3H), 6.87 (t,  $J = 5.8$  Hz, 3H).  $^{13}\text{C}$  NMR (125 MHz,  $\text{CDCl}_3$ ):  $\delta$  162.0, 160.4, 148.0, 145.4, 138.2, 136.9, 136.8, 133.2, 128.6 (q,  $J = 33.4$  Hz), 125.9, 125.6 (q,  $J = 3.7$  Hz), 121.4 (q,  $J = 271.7$  Hz), 119.7, 117.9. HRMS calcd for  $\text{M}^+$   $\text{C}_{48}\text{H}_{27}\text{F}_9\text{IrN}_3\text{S}_3$  1105.0847, found 1105.0846.

#### Triarylation of **1** with 3,5-bis(trifluoromethyl)bromobenzene (**5c**)

The reaction of 3,5-bis(trifluoromethyl)bromobenzene (0.879 g, 3 mmol), **1** (0.336 g, 0.5 mmol) and KOAc (0.294 g, 3 mmol) with  $\text{Pd}(\text{OAc})_2$  (0.005 g, 0.025 mmol) in DMAc (5 mL) at 150 °C during 48 h affords the product **5c** in 63% (0.415 g) isolated yield as a brown solid.

$^1\text{H}$  NMR (500 MHz,  $\text{CDCl}_3$ ):  $\delta$  7.97 (s, 6H), 7.70 (s, 3H), 7.67-7.754 (m, 9H), 6.89 (s, 3H), 6.87 (t,  $J=6.3$  Hz, 3H).  $^{13}\text{C}$  NMR (125 MHz,  $\text{CDCl}_3$ ):  $\delta$  161.7, 159.8, 148.0, 143.9, 137.6, 137.2, 136.9, 133.6, 131.8 (q,  $J=33.2$  Hz), 125.7 (m), 123.2, (q,  $J=272.8$  Hz), 120.30 (m), 120.1, 118.1. HRMS calcd for  $\text{M}^+$   $\text{C}_{51}\text{H}_{24}\text{F}_{18}\text{IrN}_3\text{S}_3$  1309.0469, found 1309.0469.

### Triarylation of **1** with 2-bromonaphthalene (**6c**)

The reaction of 2-bromonaphthalene (0.621 g, 3 mmol), **1** (0.336 g, 0.5 mmol) and KOAc (0.294 g, 3 mmol) with Pd(OAc)<sub>2</sub> (0.005 g, 0.025 mmol) in DMAc (5 mL) at 130 °C during 48 h affords the product **6c** in 20% (0.105 g) isolated yield as a brown solid.

<sup>1</sup>H NMR (500 MHz, CDCl<sub>3</sub>): δ 8.08 (s, 3H), 7.82 (d, *J* = 7.7 Hz, 3H), 7.78-7.73 (m, 9H), 7.60 (d, *J* = 5.4 Hz, 3H), 7.55-7.50 (m, 6H), 7.44-7.38 (m, 6H), 7.07 (s, 3H), 6.78 (t, *J* = 7.0 Hz, 3H). <sup>13</sup>C NMR (125 MHz, CDCl<sub>3</sub>): δ 162.3, 161.4, 147.9, 147.4, 136.7, 135.6, 133.7, 132.7, 132.6, 132.4, 128.1, 128.1, 127.6, 126.2, 125.6, 124.8, 124.1, 119.1, 117.6.

### Triarylation of **1** with 1-bromonaphthalene (**7c**)

The reaction of 1-bromonaphthalene (0.621 g, 3 mmol), **1** (0.336 g, 0.5 mmol) and KOAc (0.294 g, 3 mmol) with Pd(OAc)<sub>2</sub> (0.005 g, 0.025 mmol) in DMAc (5 mL) at 130 °C during 48 h affords the product **7c** in 26% (0.130 g) isolated yield as a brown solid.

<sup>1</sup>H NMR (500 MHz, CDCl<sub>3</sub>): δ 8.27 (d, *J* = 8.5 Hz, 3H), 7.82 (d, *J* = 8.1 Hz, 3H), 7.77 (d, *J* = 8.1 Hz, 3H), 7.74 (d, *J* = 5.5 Hz, 3H), 7.57 (d, *J* = 6.5 Hz, 3H), 7.55-7.49 (m, 6H), 7.43-7.38 (m, 6H), 7.14 (t, *J* = 7.7 Hz, 3H), 6.94 (s, 3H), 6.83 (t, *J* = 6.1 Hz, 3H). <sup>13</sup>C NMR (125 MHz, CDCl<sub>3</sub>): δ 162.6, 160.9, 148.1, 145.1, 136.8, 136.6, 135.7, 133.8, 133.3, 131.90, 128.1, 127.9, 127.6, 126.3, 126.1, 125.7, 125.1, 119.1, 117.5.

### Triarylation of **1** with 3-bromopyridine (**8c**)

The reaction of 3-bromopyridine (0.474 g, 3 mmol), **1** (0.336 g, 0.5 mmol) and KOAc (0.294 g, 3 mmol) with Pd(OAc)<sub>2</sub> (0.005 g, 0.025 mmol) in DMAc (5 mL) at 150 °C during 48 h affords the product **8c** in 52% (0.230 g) isolated yield as a brown solid.

<sup>1</sup>H NMR (500 MHz, CDCl<sub>3</sub>): δ 8.84 (s, 3H), 8.43 (d, *J* = 4.3 Hz, 3H), 7.84 (d, *J* = 8.0 Hz, 3H), 7.65-

7.45 (m, 9H), 7.23 (dd,  $J = 7.8, 4.6$  Hz, 3H), 6.86 (s, 3H), 6.82 (t,  $J = 5.9$  Hz, 3H).  $^{13}\text{C}$  NMR (125 MHz,  $\text{CDCl}_3$ ):  $\delta$  162.0, 160.4, 148.0, 147.9, 147.0, 143.2, 136.9, 136.4, 132.9, 132.8, 130.9, 123.5, 119.7, 117.9. HRMS calcd for  $\text{M}^+$   $\text{C}_{42}\text{H}_{27}\text{IrN}_6\text{S}_3$  904.1083, found 904.1085.

#### Triarylation of **1** with 5-bromopyrimidine (**9c**)

The reaction of 5-bromopyrimidine (0.476 g, 3 mmol), **1** (0.336 g, 0.5 mmol) and KOAc (0.294 g, 3 mmol) with  $\text{Pd}(\text{OAc})_2$  (0.005 g, 0.025 mmol) in DMAc (5 mL) at 130 °C during 48 h affords the product **9c** in 56% (0.252 g) isolated yield as a brown solid.

$^1\text{H}$  NMR (500 MHz,  $\text{CDCl}_3$ ):  $\delta$  9.02 (s, 3H), 8.89 (s, 6H), 7.65-7.55 (m, 9H), 6.86 (t,  $J = 5.9$  Hz, 3H), 6.84 (s, 3H).  $^{13}\text{C}$  NMR (125 MHz,  $\text{CDCl}_3$ ):  $\delta$  161.6, 159.5, 156.8, 153.3, 148.0, 139.1, 137.7, 137.2, 133.5, 128.9, 120.3, 118.2. HRMS calcd for  $\text{M}^+$   $\text{C}_{39}\text{H}_{24}\text{IrN}_9\text{S}_3$  907.0941, found 907.9042.

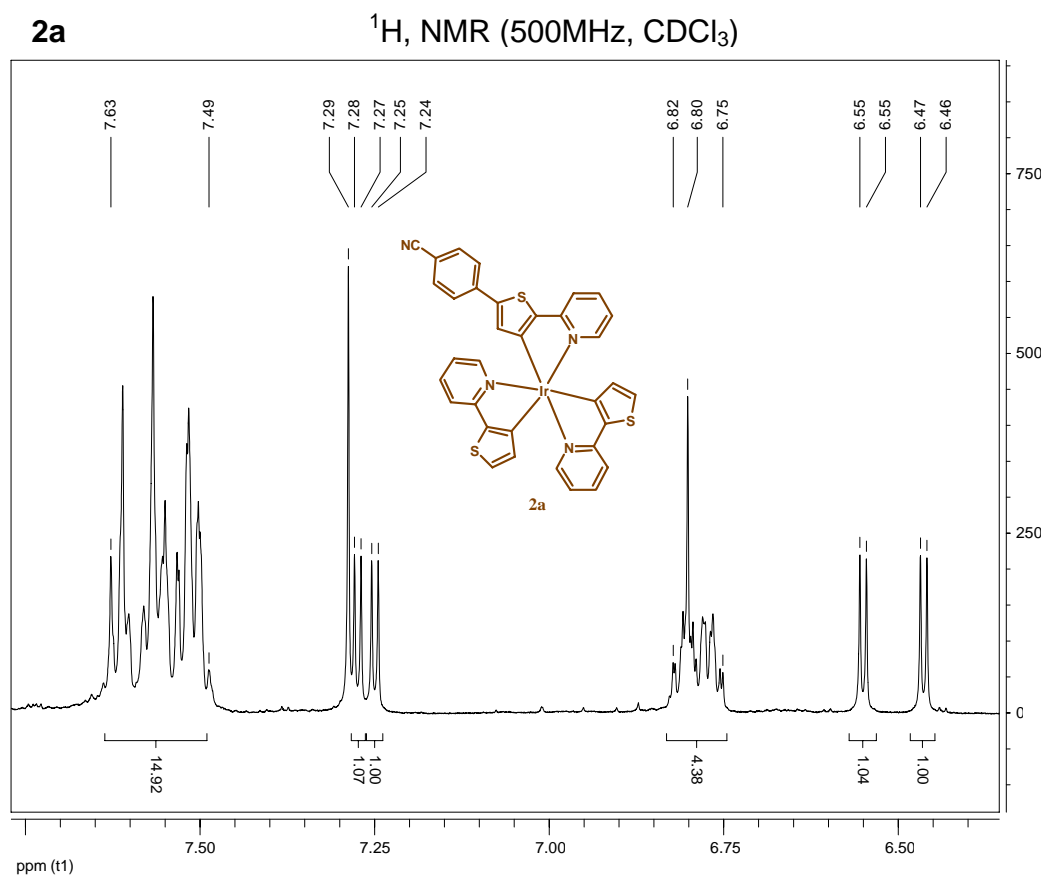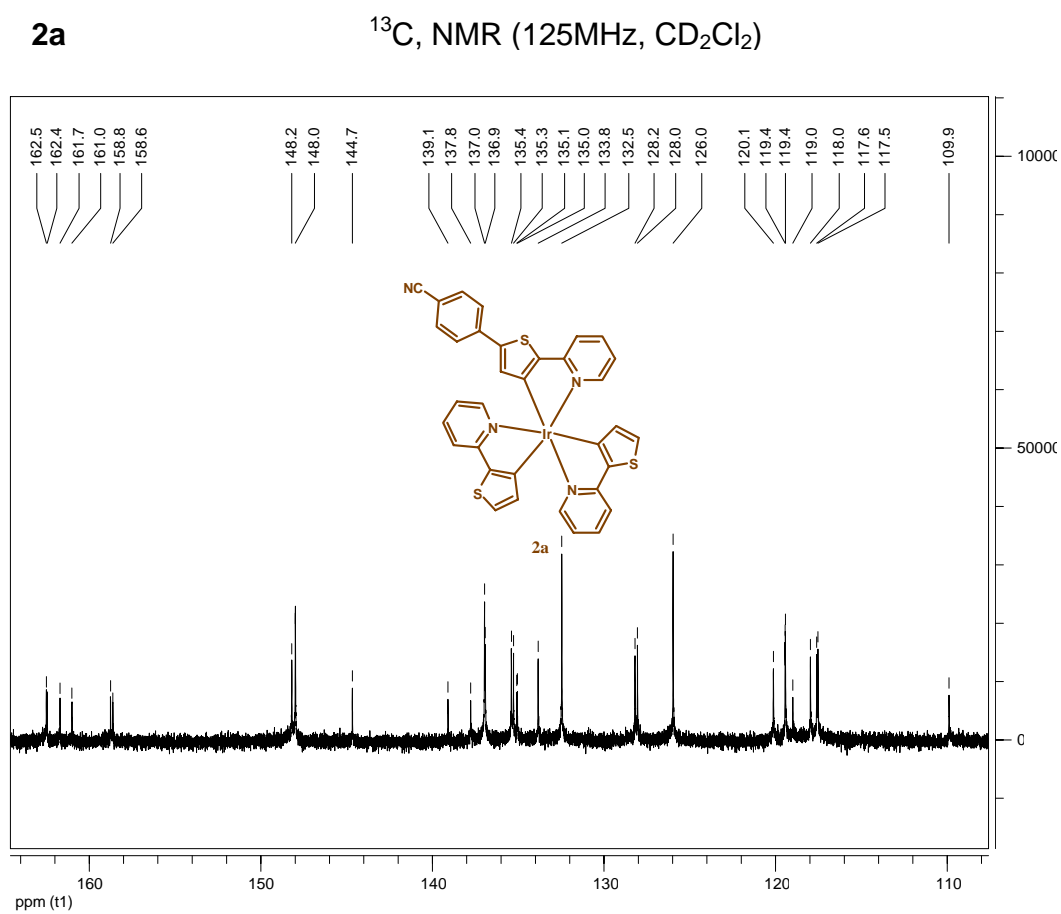

**2b**

$^1\text{H}$ , NMR (500MHz,  $\text{CDCl}_3$ )

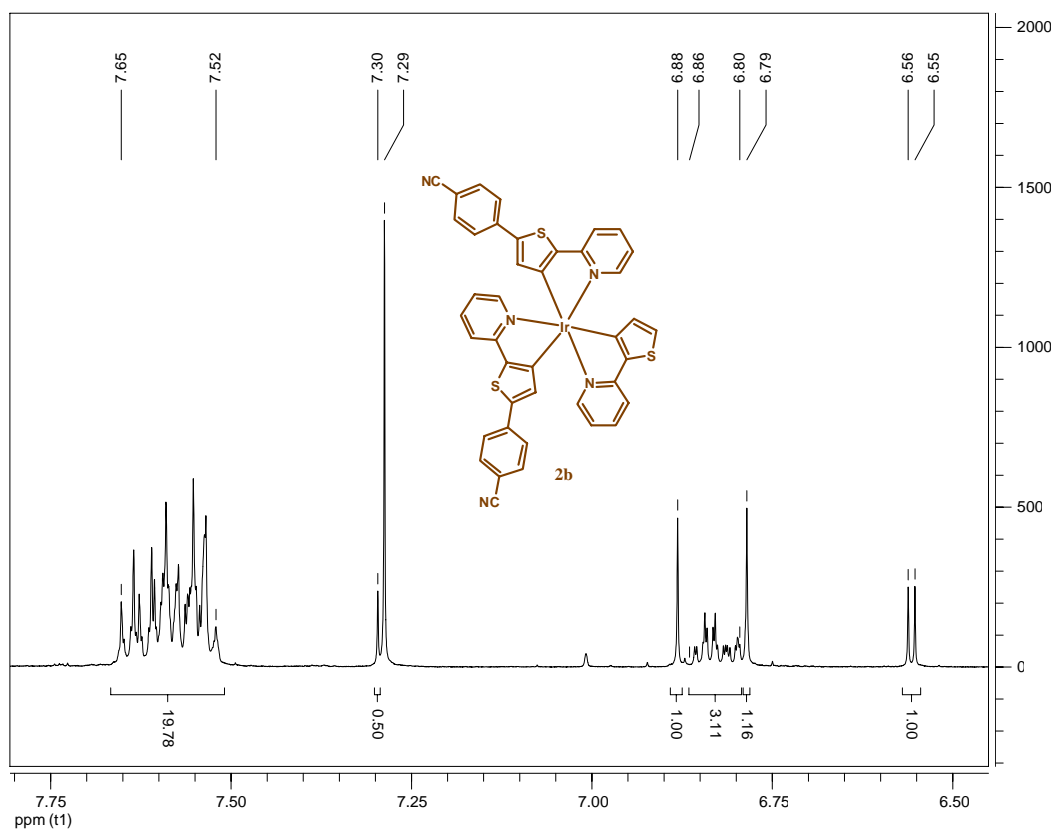

**2b**

$^{13}\text{C}$ , NMR (125MHz,  $\text{CD}_2\text{Cl}_2$ )

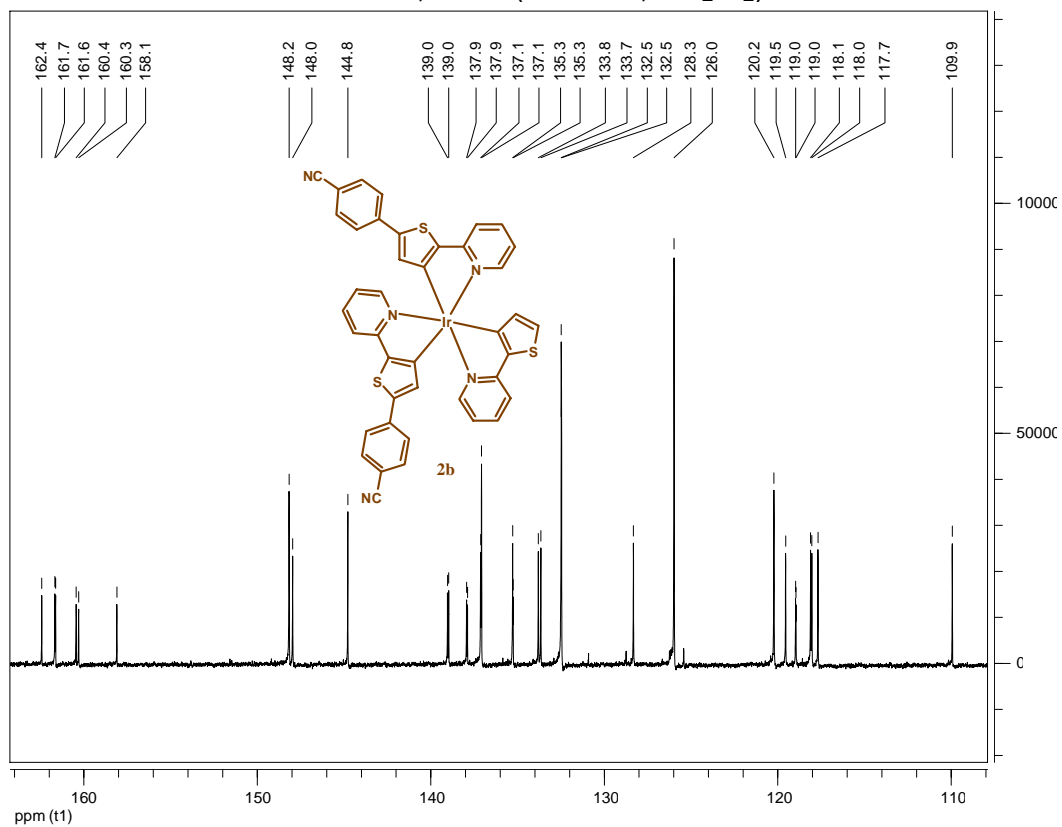

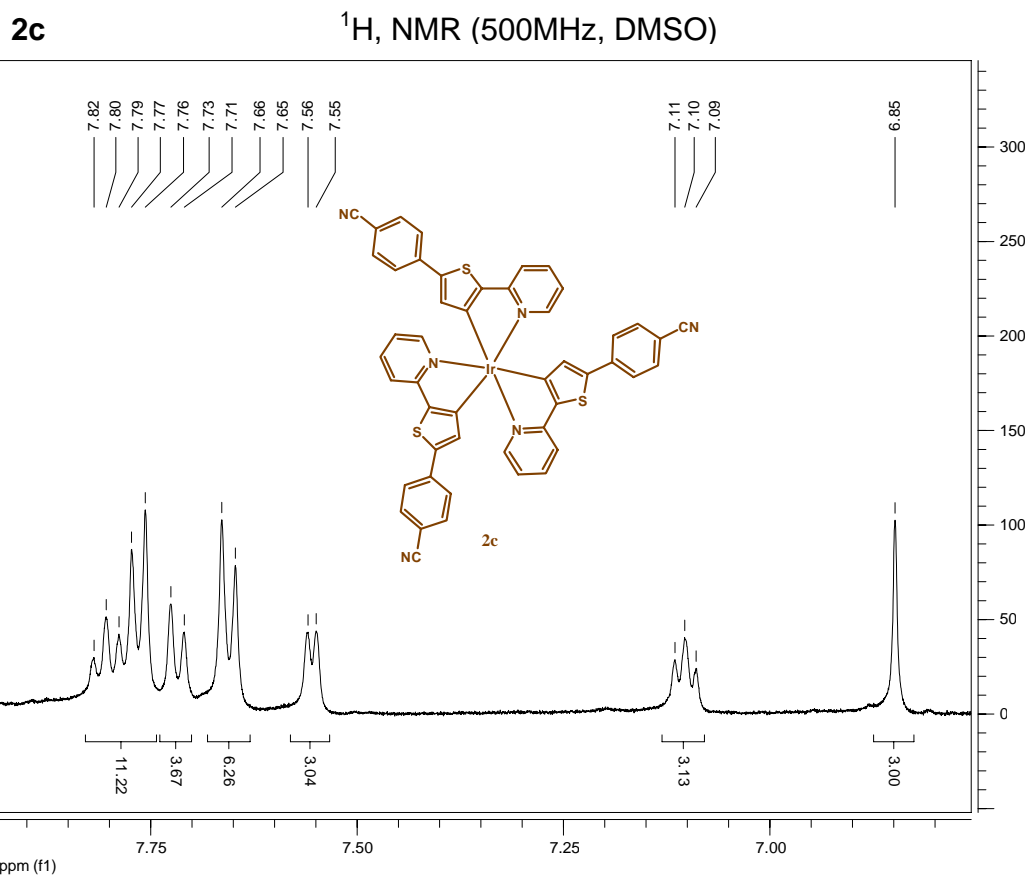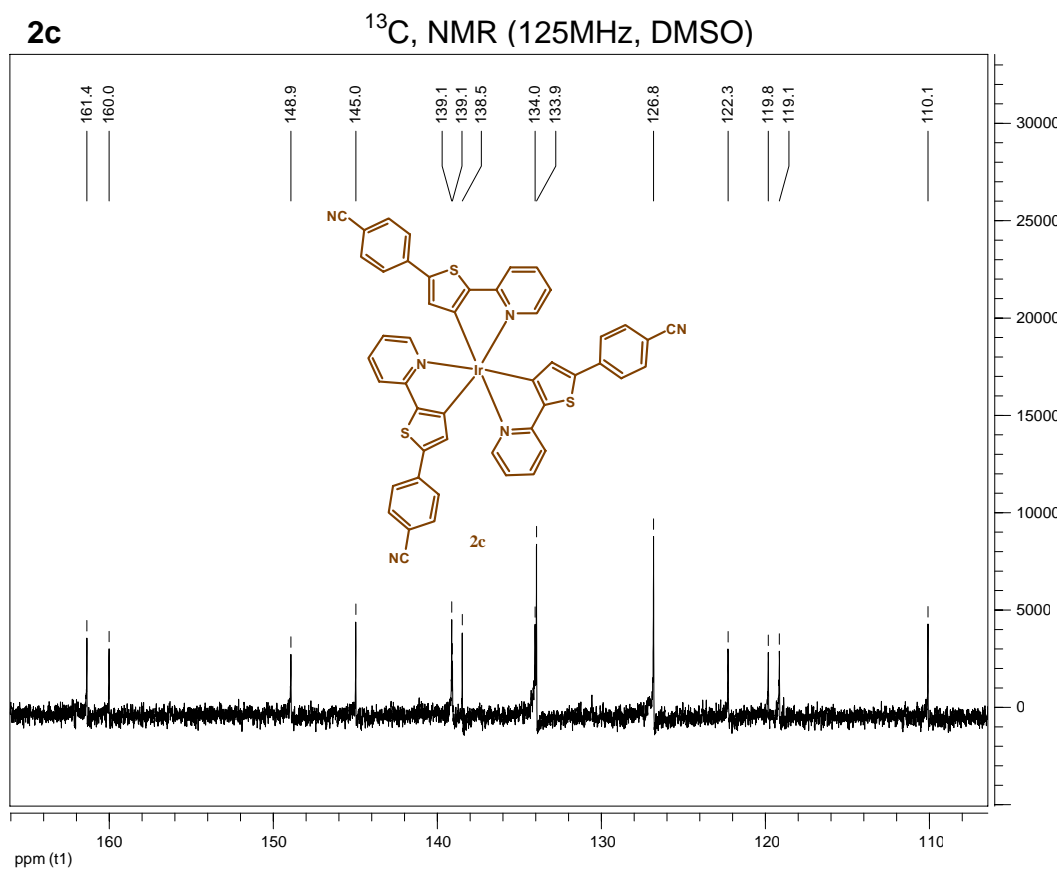



**3b**

$^1\text{H}$ , NMR (500MHz,  $\text{CD}_2\text{Cl}_2$ )

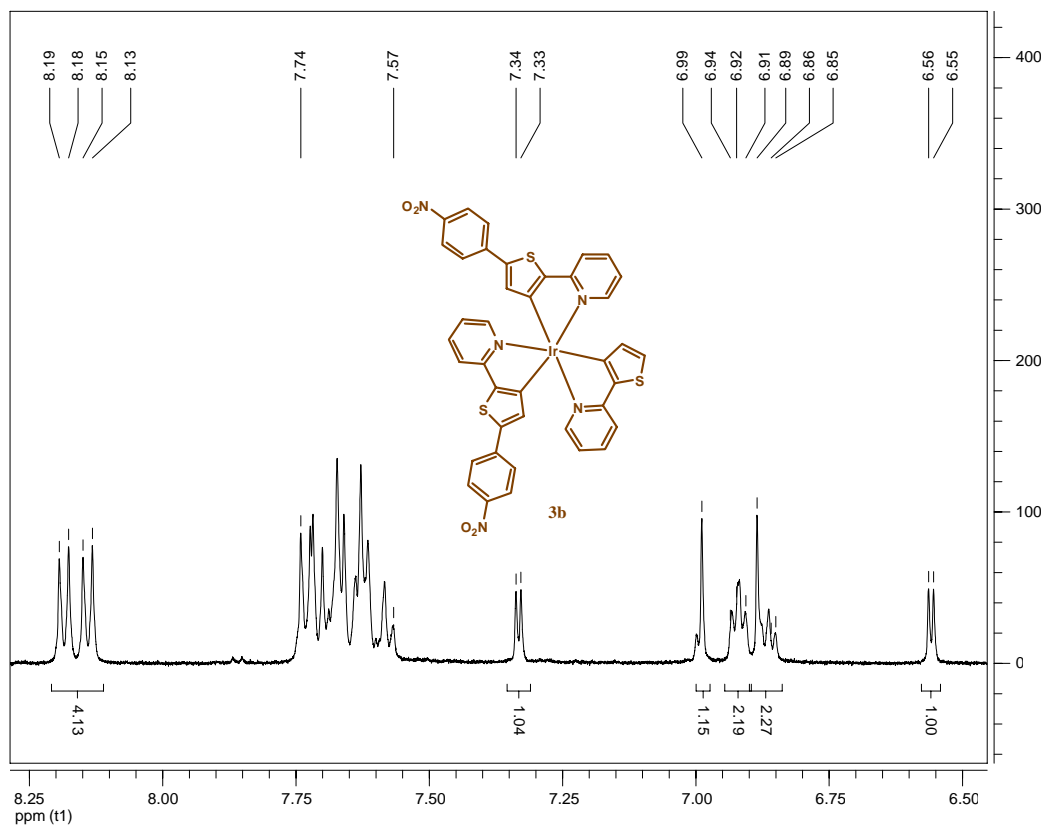

**3b**

$^{13}\text{C}$ , NMR (125MHz,  $\text{CD}_2\text{Cl}_2$ )

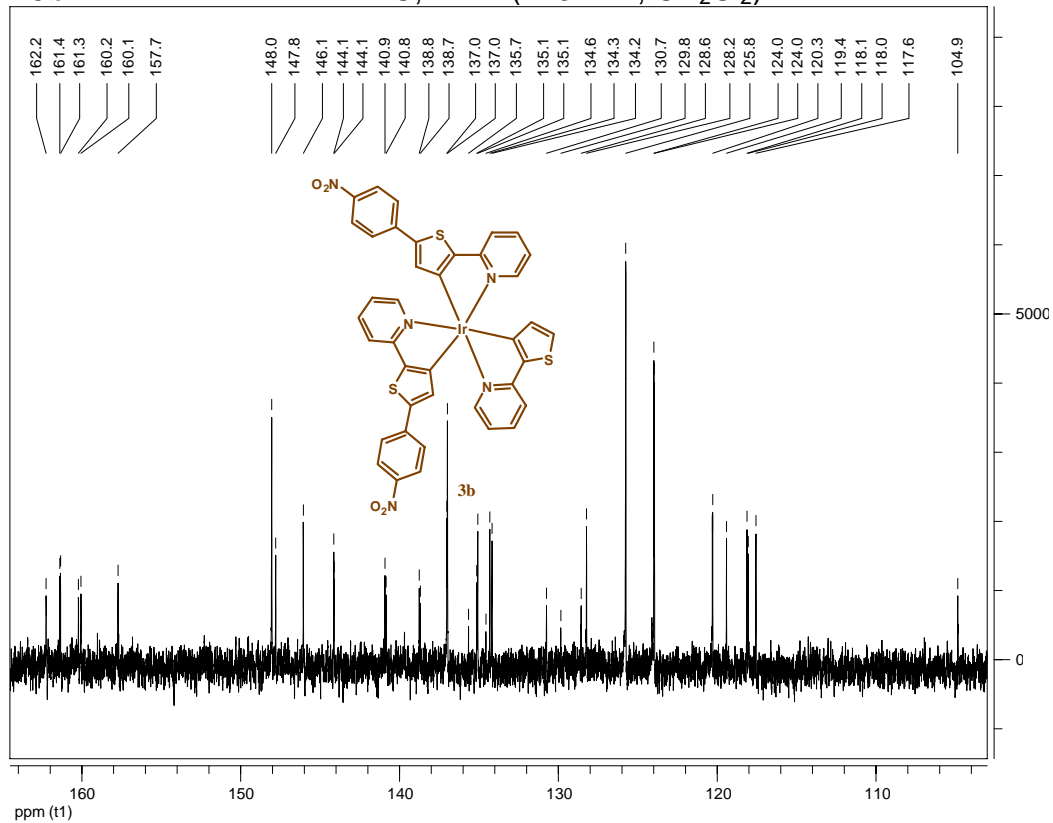

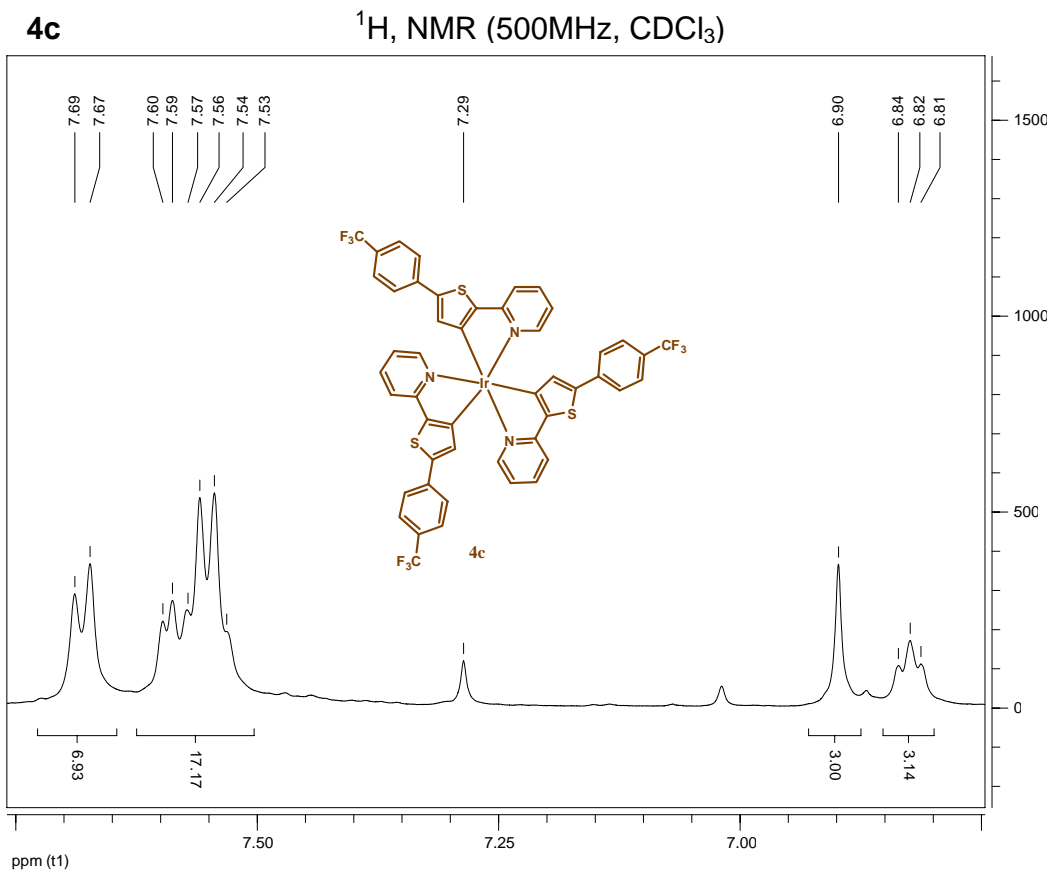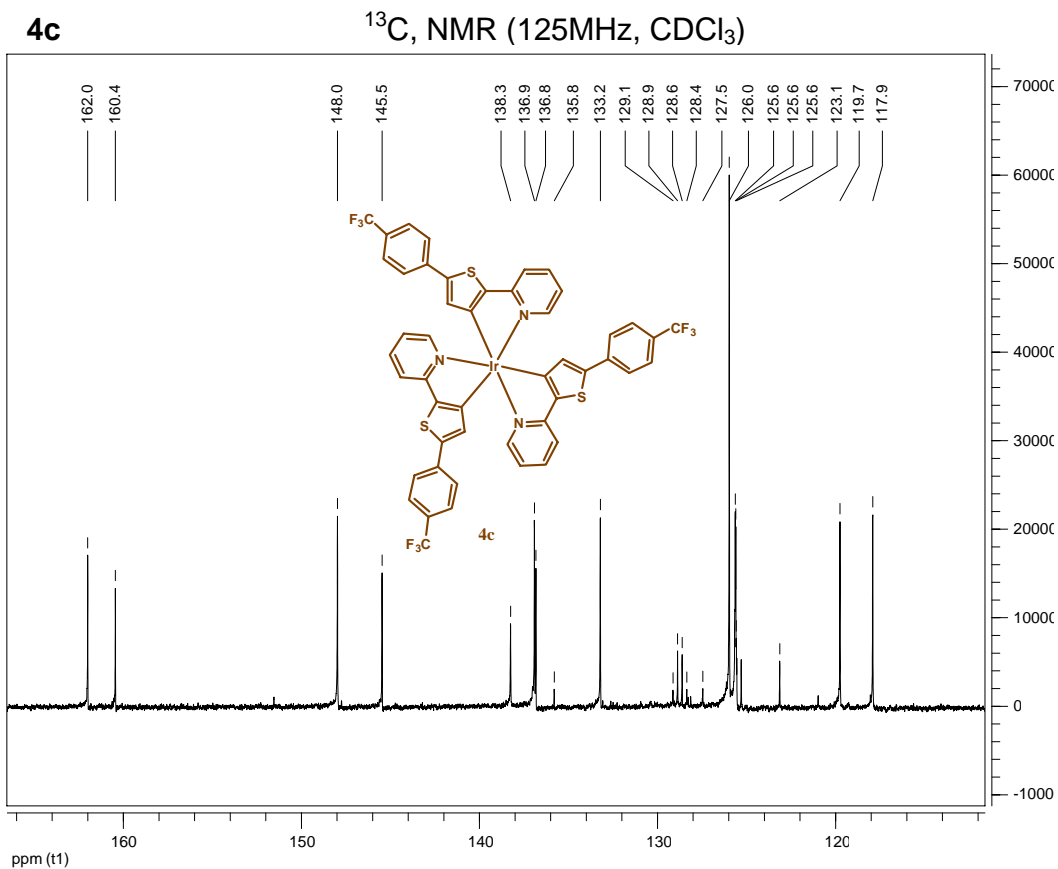

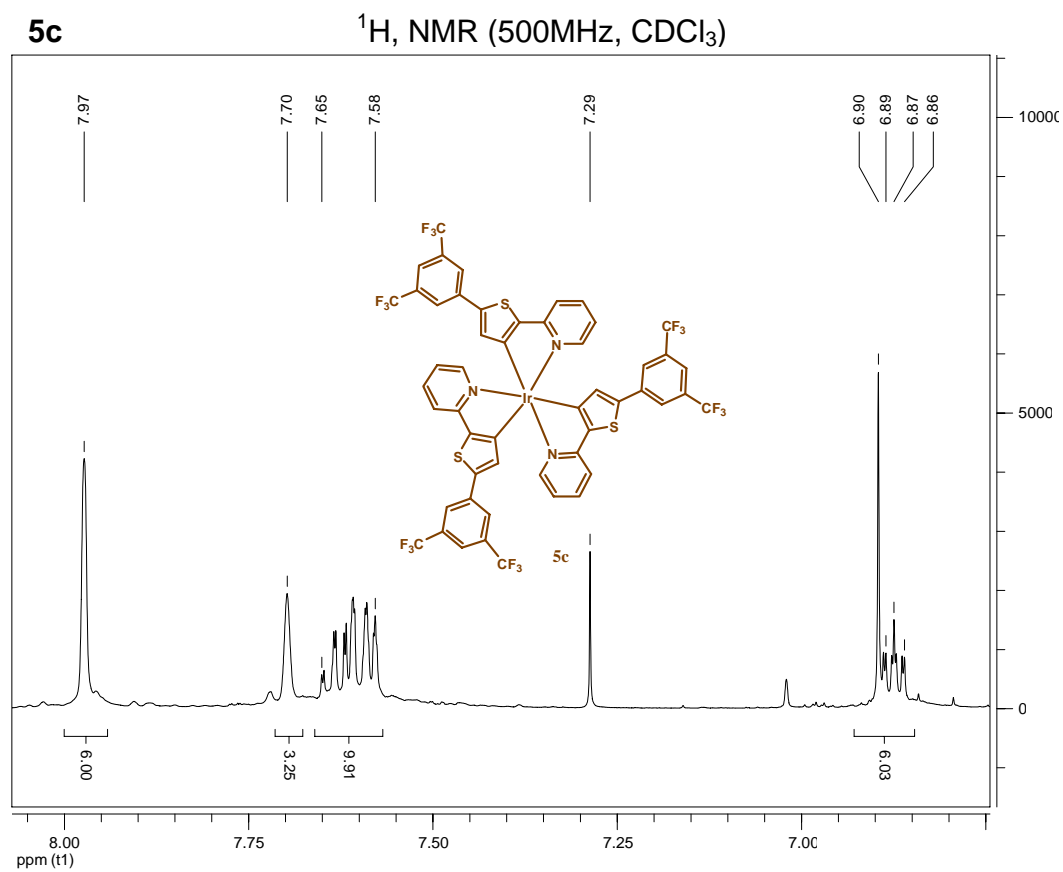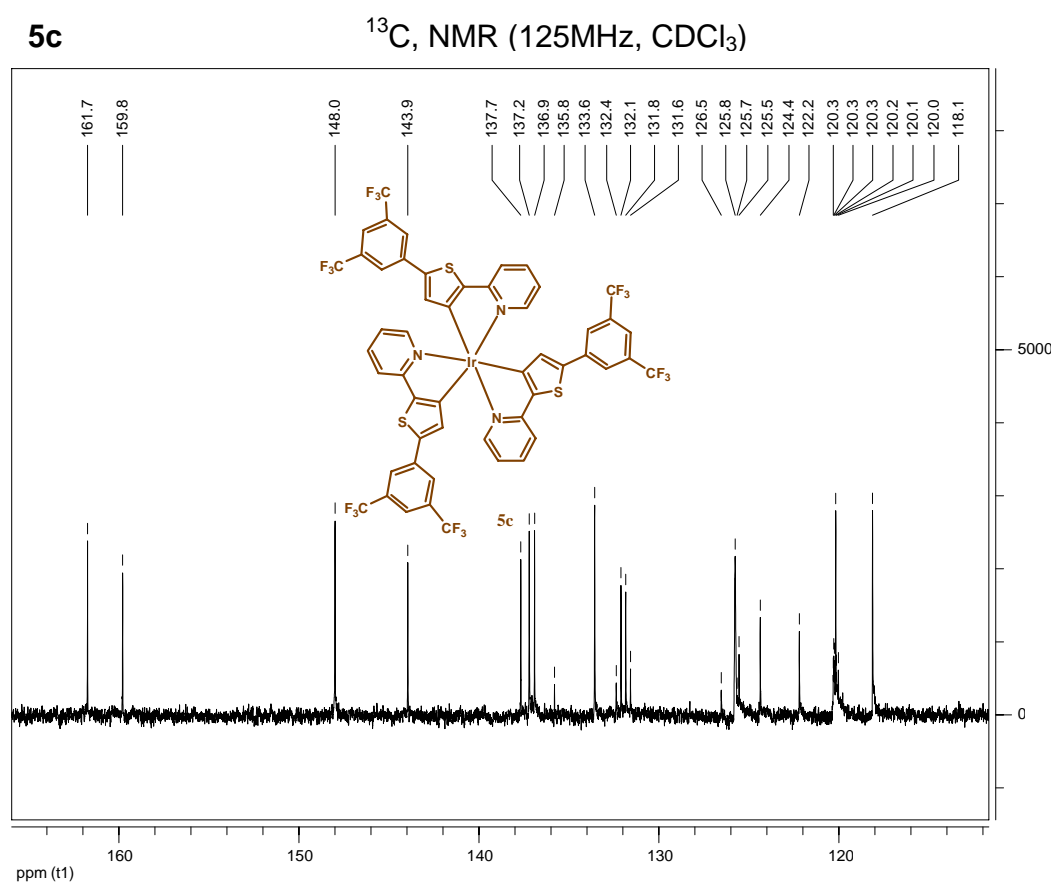

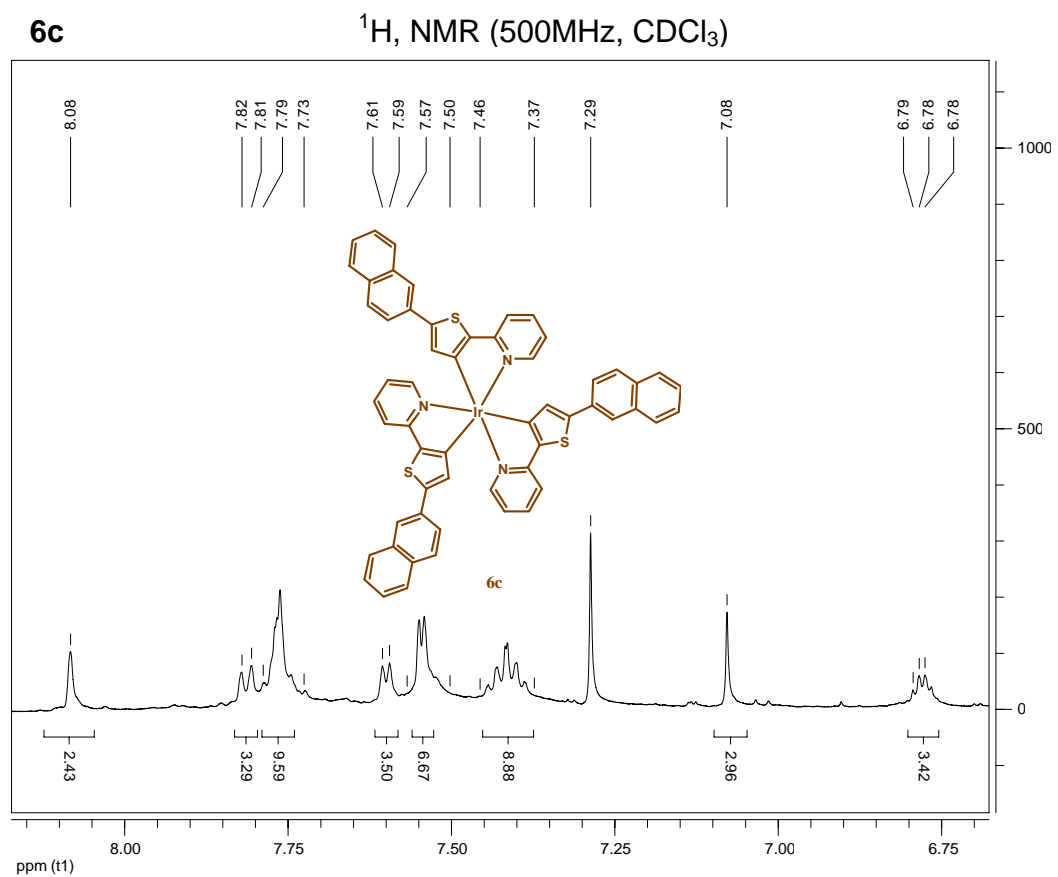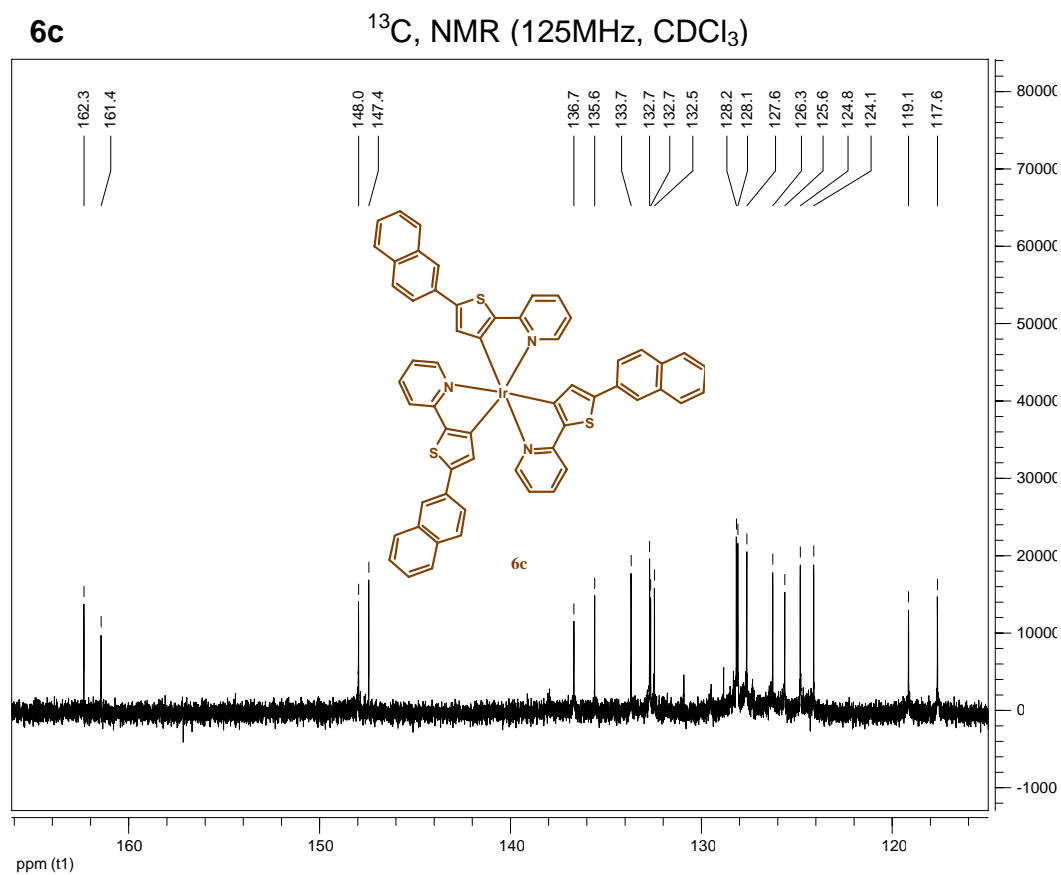

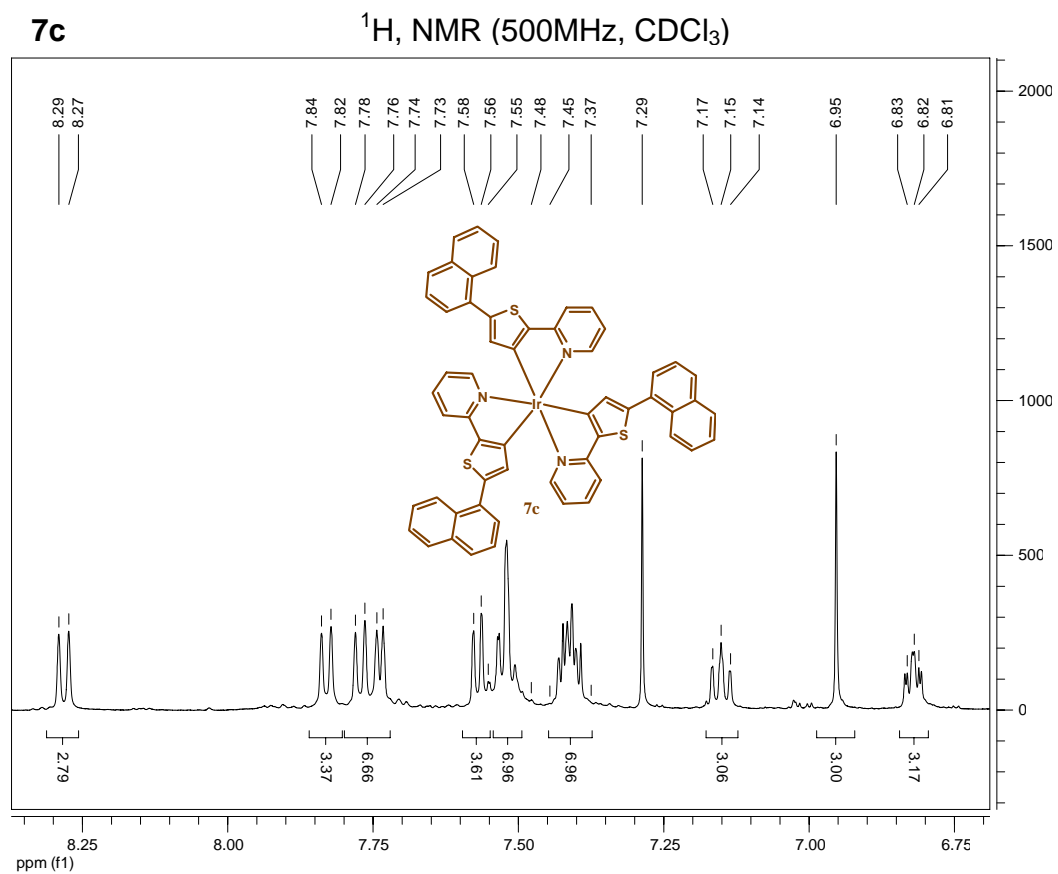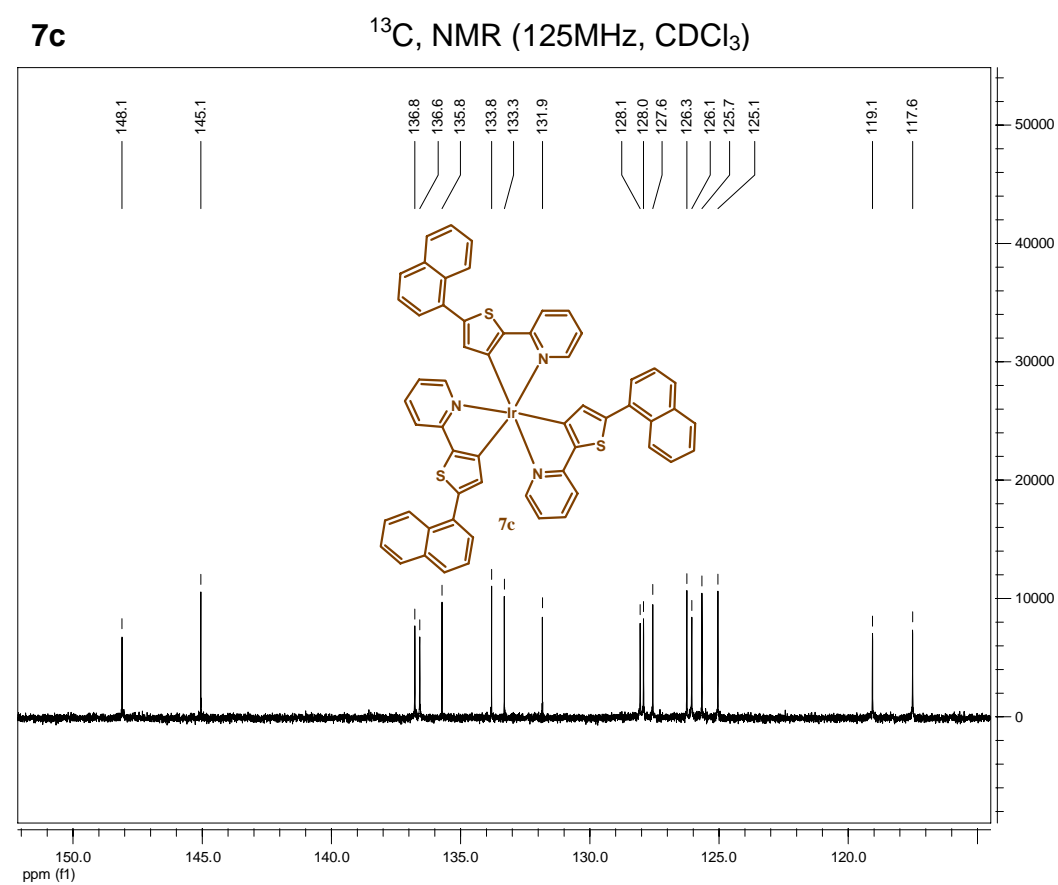

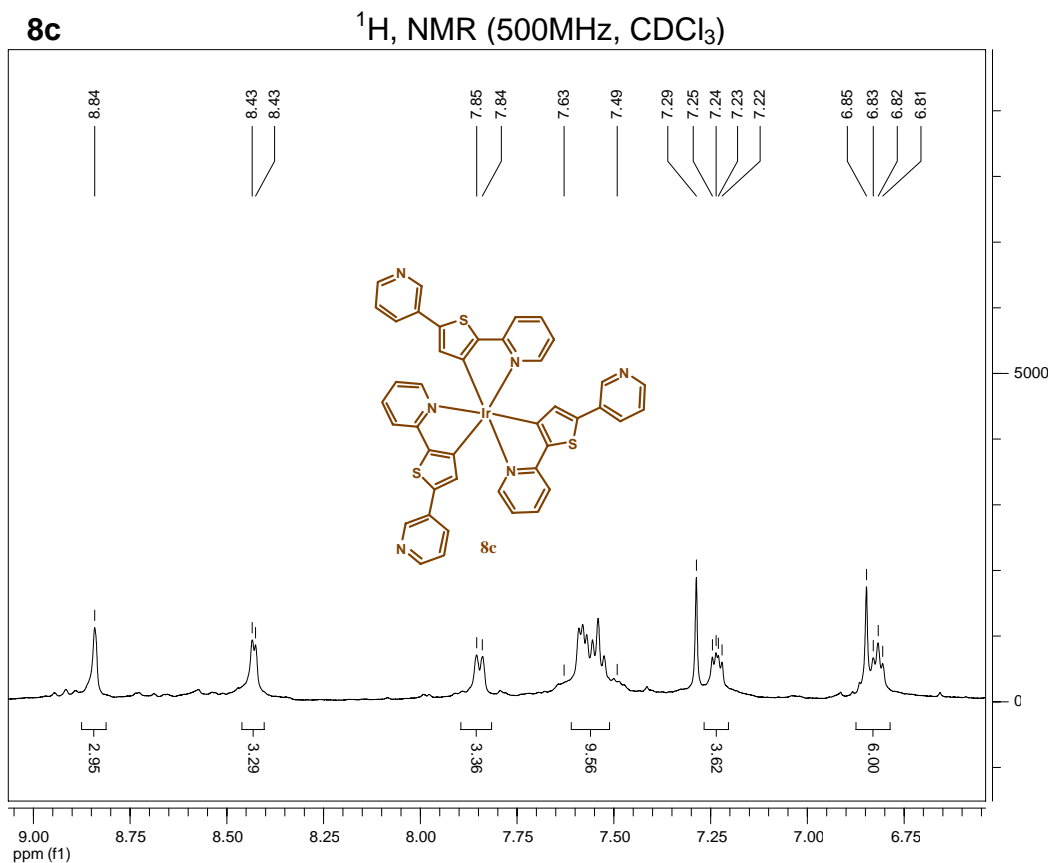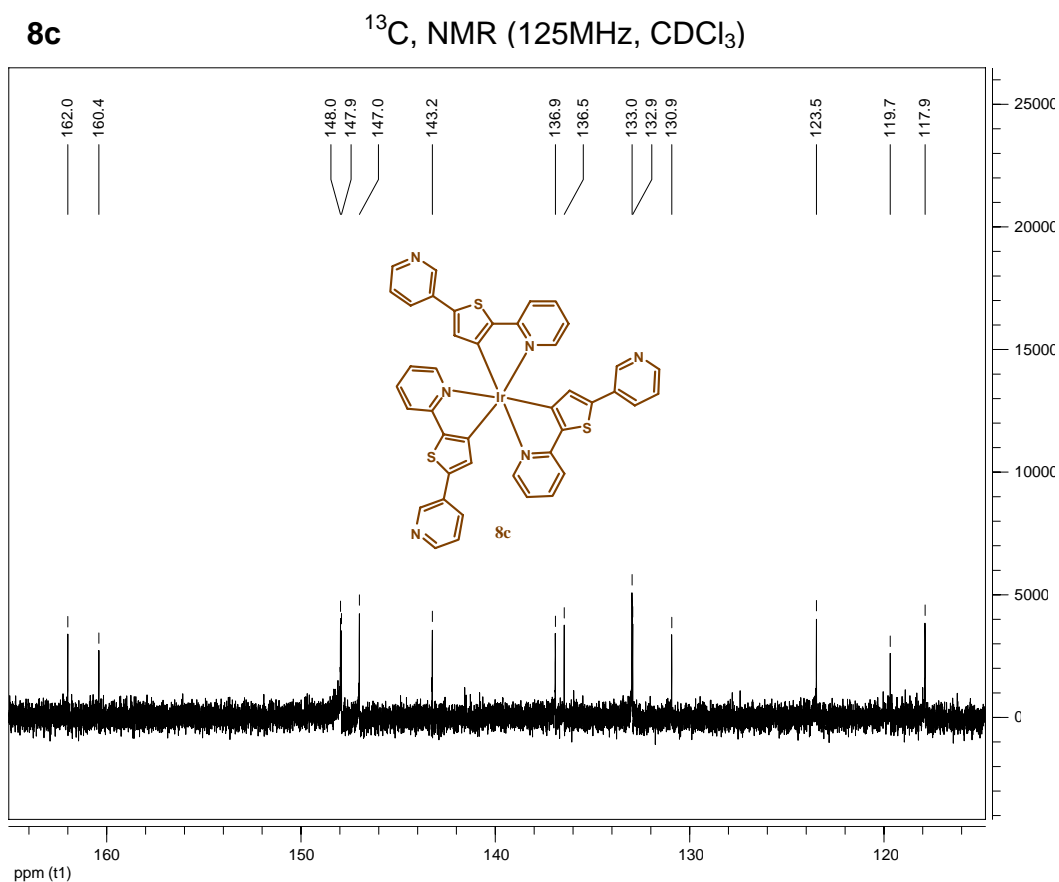

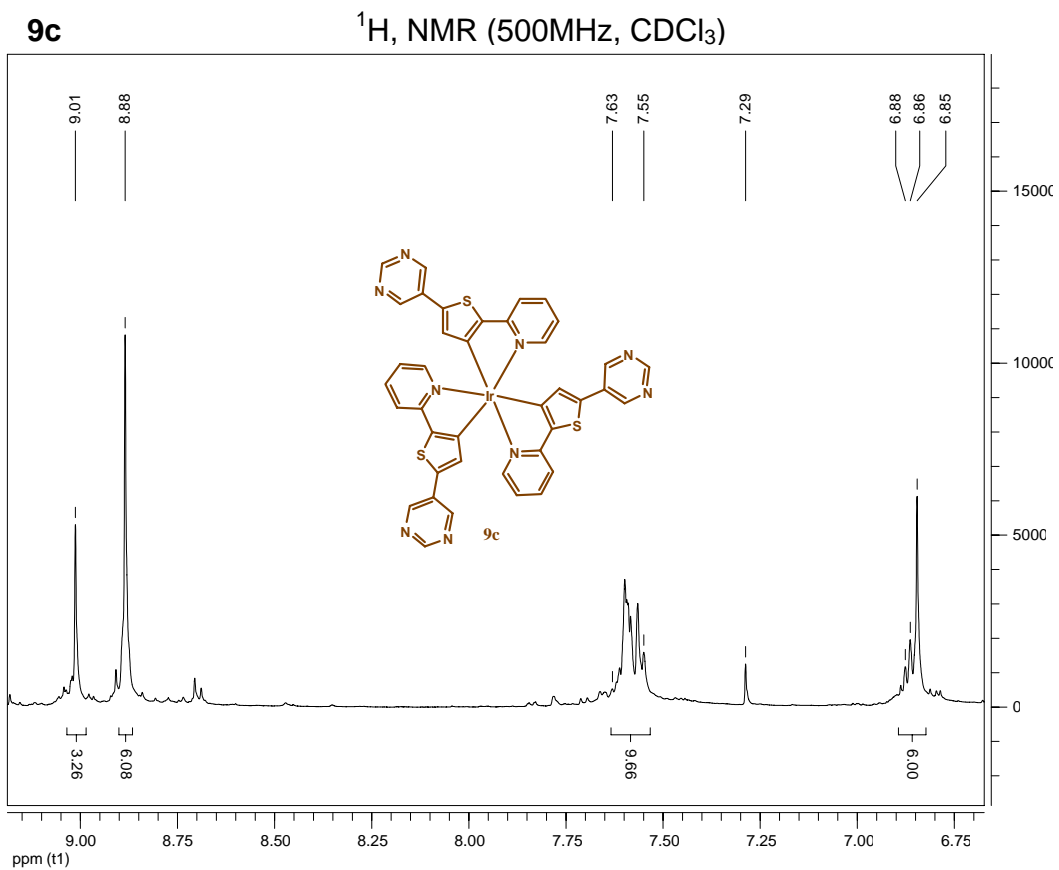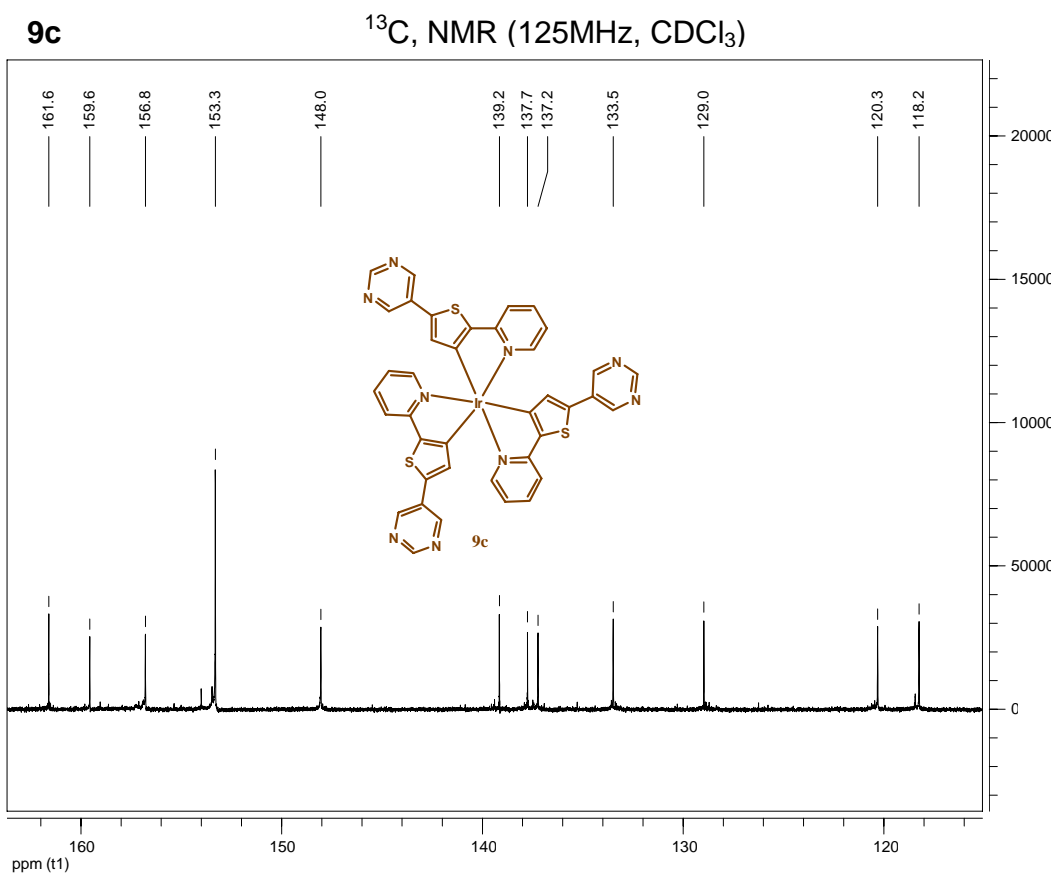

**Table S1** Full luminescence data for the complexes investigated.<sup>(a)</sup>

|                                           | $\lambda_{\max} / \text{nm}^{(b)}$ | $\Phi_{\text{lum}} \times 10^2$ | $\tau / \text{ns}$<br>degassed<br>[aerated] | $k_{\text{Q}}^{\text{O}_2} / 10^8 \text{ M}^{-1} \text{ s}^{-1 (c)}$ | $k_{\text{r}} / 10^3 \text{ s}^{-1 (d)}$ | $\Sigma k_{\text{nr}} / 10^4 \text{ s}^{-1 (d)}$ | $\lambda_{\max} (77 \text{ K}) / \text{nm}^{(e)}$ | $\tau (77 \text{ K}) / \mu\text{s}^{(e)}$ |
|-------------------------------------------|------------------------------------|---------------------------------|---------------------------------------------|----------------------------------------------------------------------|------------------------------------------|--------------------------------------------------|---------------------------------------------------|-------------------------------------------|
| <b>1</b> Ir(thpy) <sub>3</sub>            | 548, 592,<br>643(sh)               | 40                              | 7100 [87]                                   | 52                                                                   | 56                                       | 8.5                                              | 542, 563,<br>588, 612,<br>640                     | 9.2                                       |
| <b>2a</b> mono-CN                         | 677, 742,<br>812(sh)               | 0.84                            | 1100 [370]                                  | 8.2                                                                  | 7.6                                      | 90                                               | 667, 699,<br>736, 777                             | 1.1                                       |
| <b>2b</b> bis-CN                          | 676, 740,<br>813(sh)               | 0.81                            | 1300 [380]                                  | 8.5                                                                  | 6.2                                      | 76                                               | 668, 698,<br>737, 776                             | 1.3                                       |
| <b>2c</b> tris-CN                         | 673, 738                           | 1.1                             | 1500 [420]                                  | 7.8                                                                  | 7.3                                      | 66                                               | 667, 698,<br>734, 774                             | 1.8                                       |
| <b>4c</b> CF <sub>3</sub>                 | 652, 712,<br>795(sh)               | 2.0                             | 2400 [370]                                  | 10                                                                   | 8.3                                      | 41                                               | 647, 678,<br>712, 747,<br>789                     | 2.6                                       |
| <b>5c</b> (CF <sub>3</sub> ) <sub>2</sub> | 654, 714,<br>798(sh)               | 1.7                             | 2100 [350]                                  | 11                                                                   | 8.1                                      | 47                                               | 653, 682,<br>718, 756,<br>798                     | 2.2                                       |
| <b>8c</b> m-pyr                           | 645, 703,<br>784(sh)               | 1.9                             | 2800 [390]                                  | 10                                                                   | 6.8                                      | 35                                               | 649, 669,<br>704, 736,<br>779                     | 3.1                                       |

(a) Values refer to solutions in CH<sub>2</sub>Cl<sub>2</sub> at 298 K, except where indicated otherwise. (b)  $\lambda_{\text{excitation}} = 455 \text{ nm}$ . (c)  $k_{\text{Q}}^{\text{O}_2}$  is the biomolecular rate constant for quenching by dissolved molecular oxygen, estimated on the basis of the lifetimes in degassed and air-equilibrated solutions. (d)  $k_{\text{r}}$  and  $\Sigma k_{\text{nr}}$  are the estimated radiative and non-radiative rate constants estimated from the  $\Phi_{\text{lum}}$  and  $\tau$  values, assuming that formation of the emitting state occurs with unitary efficiency. (e) In diethyl ether / isopentane / ethanol (2:2:1 v/v).



**Figure S1** Overlay of the absorption spectra of **2a**, **2b** and **2c** in CH<sub>2</sub>Cl<sub>2</sub> at 298 K.

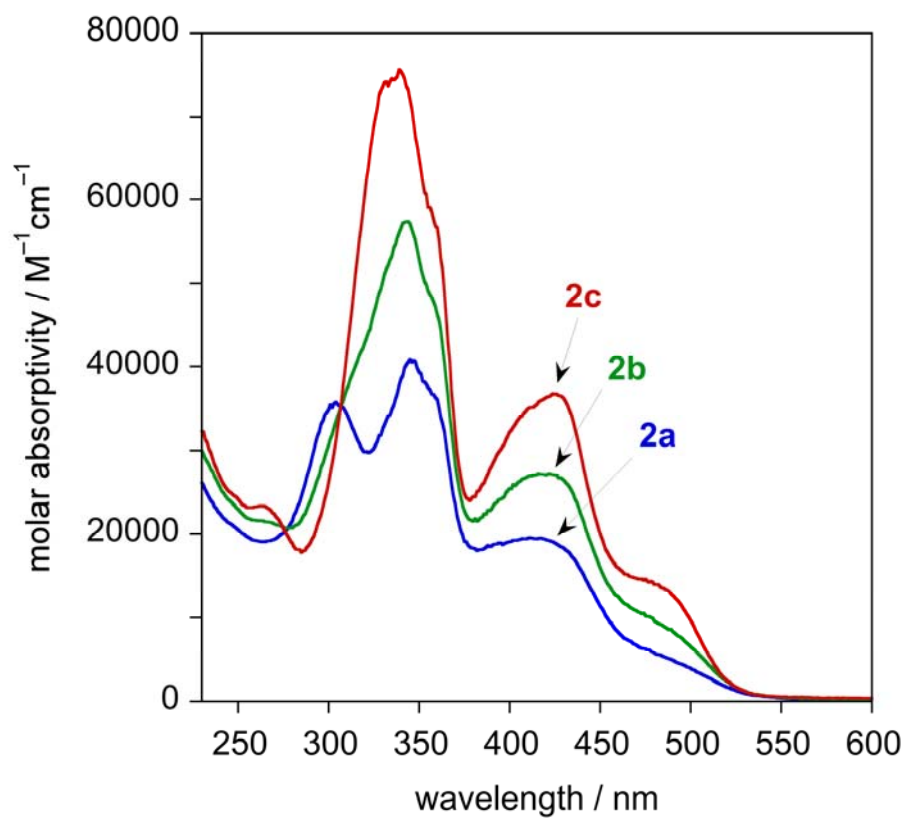

**Figure S2** Overlay of the emission spectra recorded in EPA at 77 K {EPA = diethyl ether / isopentane / ethanol, 2:2:1 v/v}

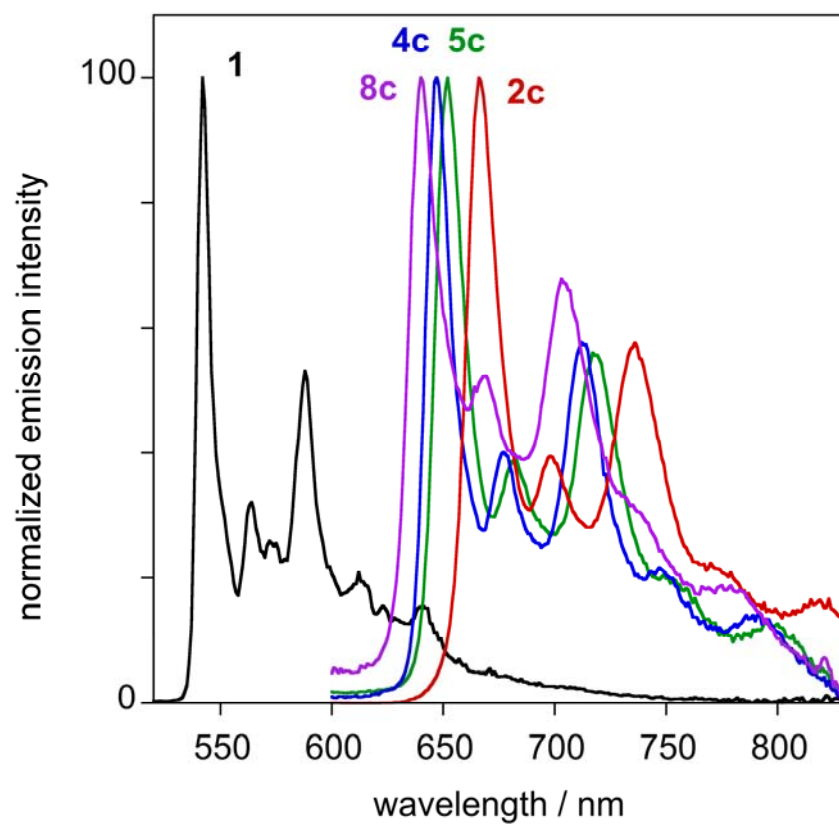

## Instrumentation for luminescence measurements

UV-vis absorption spectra were recorded using analytikjena SPECORD 205 spectrometer using quartz cuvettes of 1 cm path length. Steady state emission spectra were measured using a JobinYvon FluoroMax 2 spectrometer. The spectra shown are corrected for the wavelength dependence of the detector, and the quoted emission maxima refer to the values after correction. Luminescence quantum yields were determined using  $[\text{Ru}(\text{bpy})_3]\text{Cl}_2$  in air-equilibrated water as the standard, for which  $\Phi_{\text{lum}} = 0.028$  [K. Nakamaru, *Bull. Chem. Soc. Jpn*, 1982, **55**, 2697]. Estimated uncertainty in  $\Phi_{\text{lum}}$  is  $\pm 20\%$  or better.

The luminescence lifetimes of the complexes were measured by time-correlated single-photon counting (TCSPC), following excitation at 374 nm with an EPL-375 pulsed-diode laser. The emitted light was detected at  $90^\circ$  using a Peltier-cooled R928 PMT after passage through a monochromator. The estimated uncertainty in the quoted lifetimes is  $\pm 10\%$  or better.
